# Supplementary material for: An autocrine TGF-β/ZEB/miR-200 signaling network regulates establishment and maintenance of epithelial-mesenchymal transition
Source: PubMed Central journal article supplement — Mol Biol Cell. 2011 May 15;22(10):1686–98. doi: 10.1091/mbc.E11-02-0103 (PMC3093321; doi:10.1091/mbc.e11-02-0103), 2011-05-15
Supplement: E11-02-0103_1.pdf [file E11-02-0103_1.pdf]

**A****MDCK-TGF****+ SB-431542**

Day 0

Day 2

Day 7

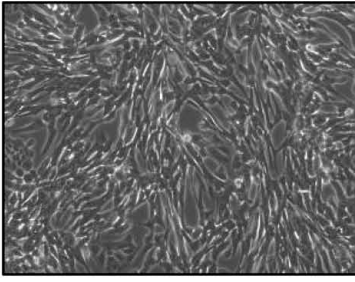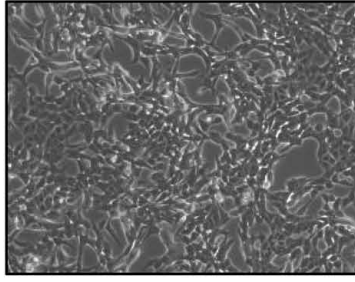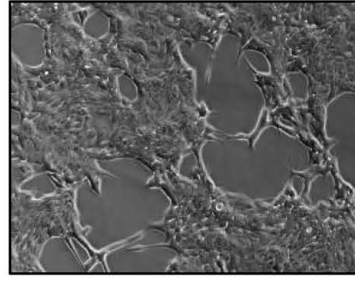**B****MDCK**+ TGF- $\beta$ 2- TGF- $\beta$ 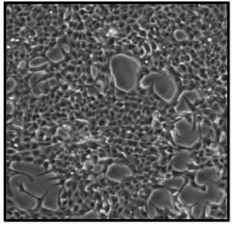+ TGF- $\beta$ 3

Day 2

Day 5

Day 8

Day 12

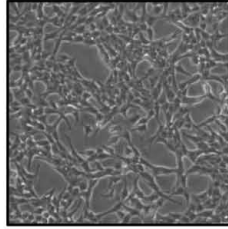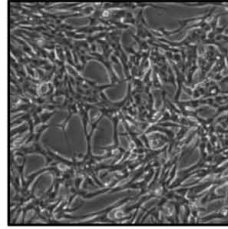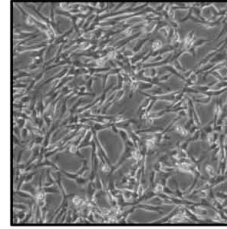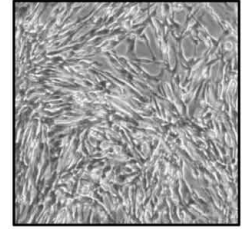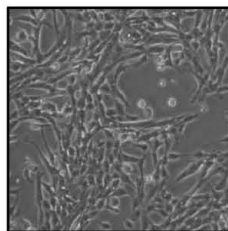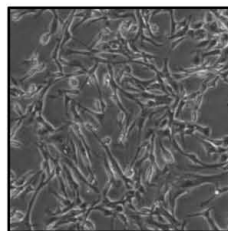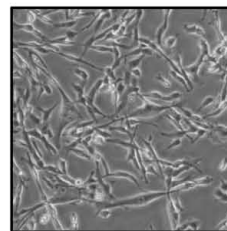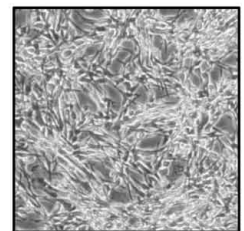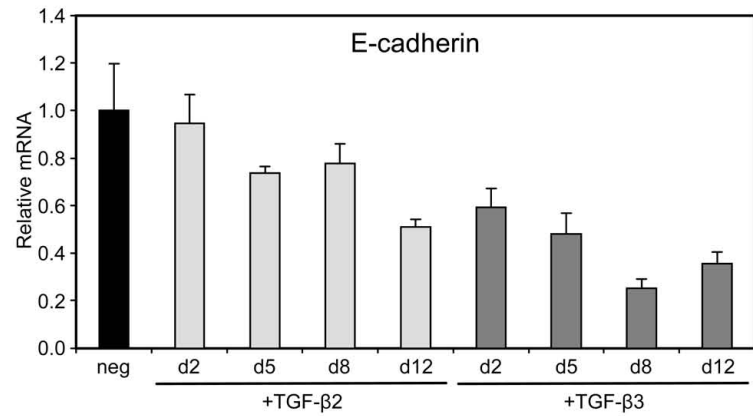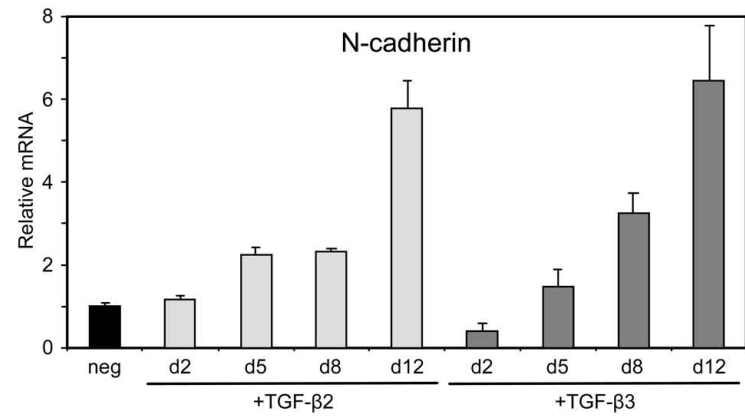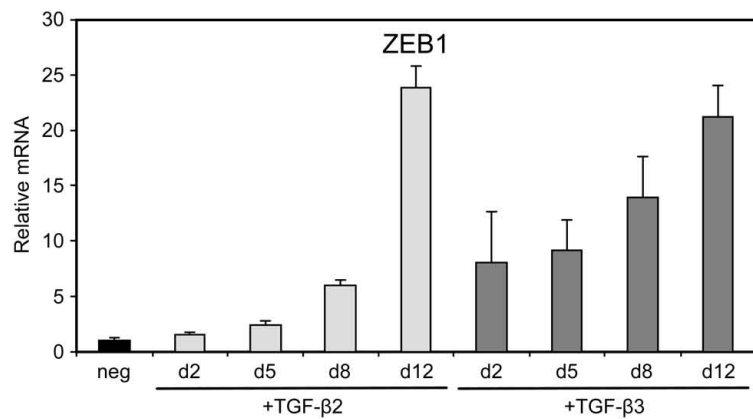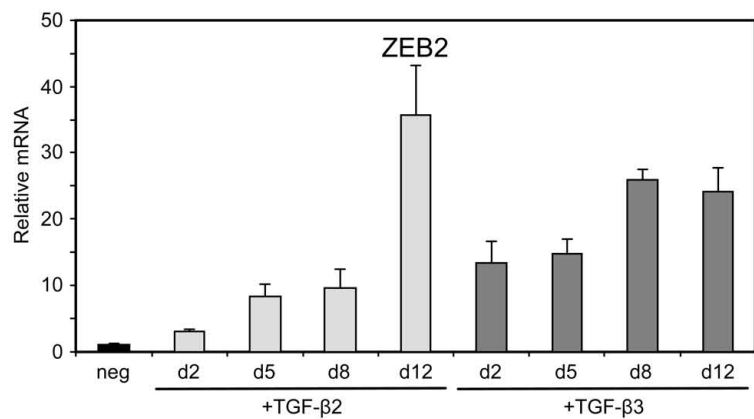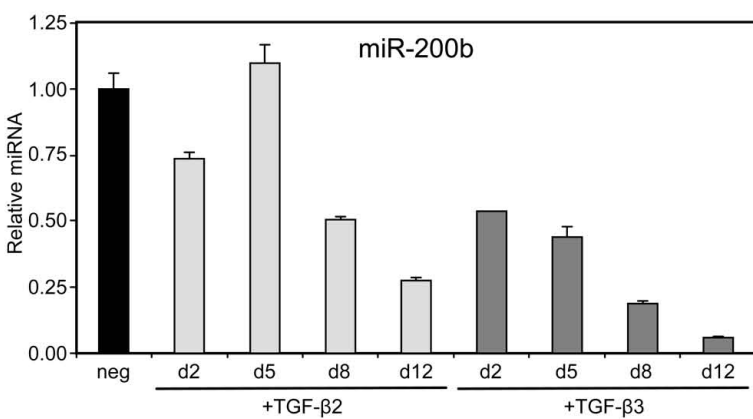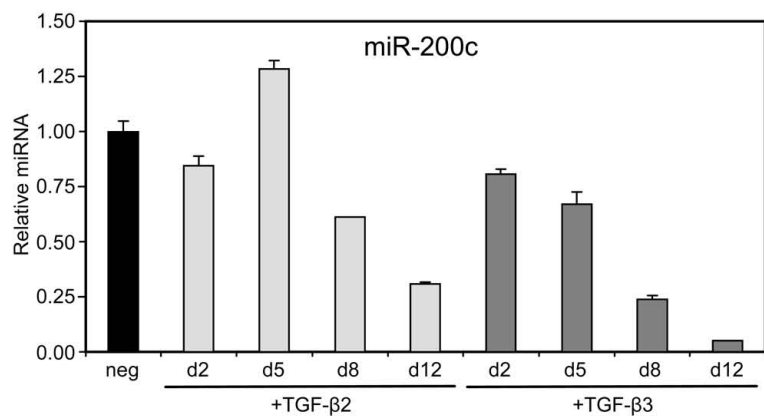

**Supplementary Figure 1.** (A) Cell morphology of MDCK-TGF cells treated with the TGF- $\beta$ R1 inhibitor SB-431542 (1 $\mu$ M) showing they revert to an epithelial phenotype. (B) TGF- $\beta$ 2 and - $\beta$ 3 (1ng/ml) induce EMT in MDCK cells with progressive changes in E-cadherin, ZEB and miR-200 expression over a 12 day timecourse. Data is representative of duplicate experiments. Each value shown is the mean  $\pm$ SD of 3 replicate measurements.

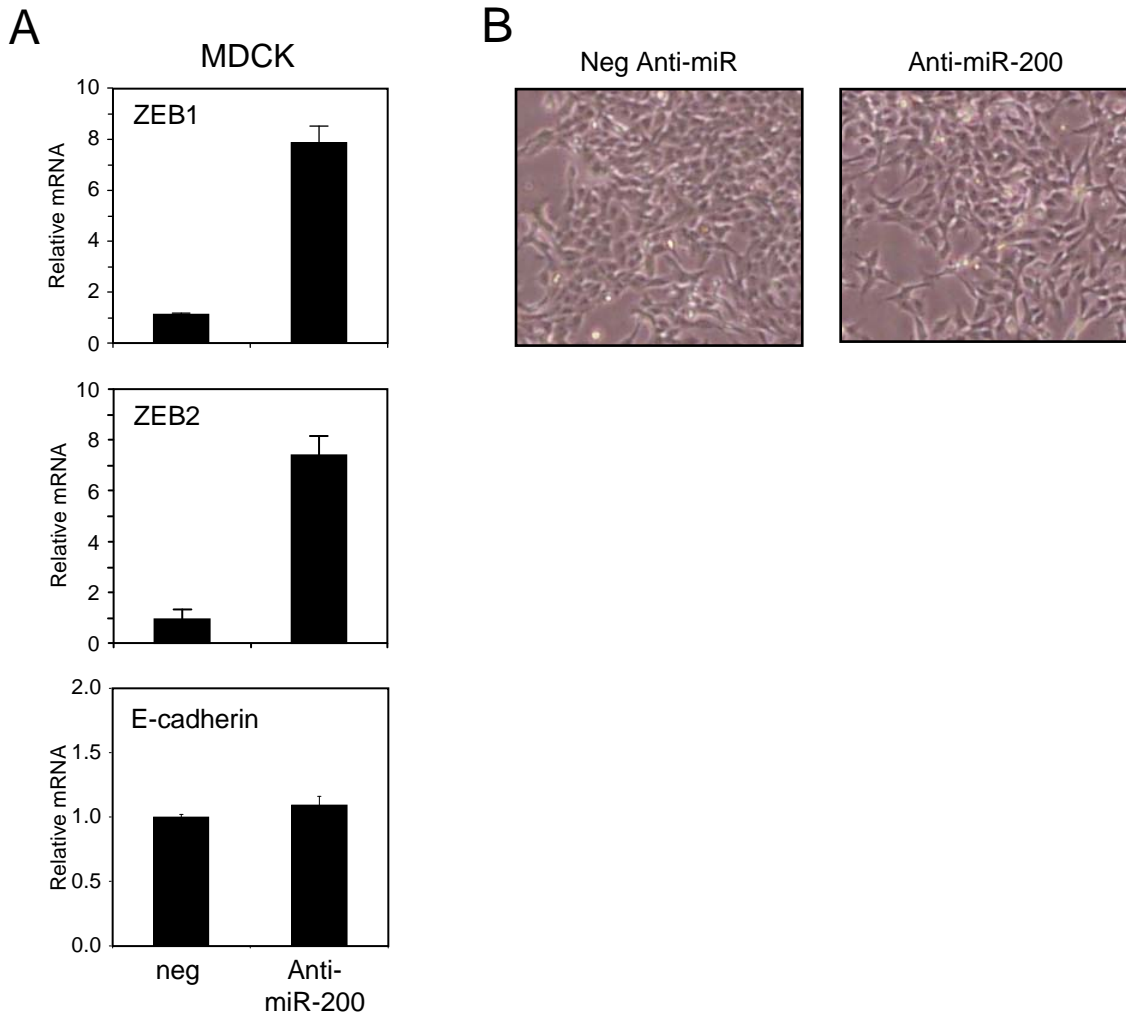

**Supplementary Figure 2.** (A) Measurement of EMT markers after transfection of MDCK cells with a control or LNA miR-200 family Anti-miR (10 d). Data are representative of duplicate experiments. Each value shown is the mean  $\pm$ SD of 3 replicate measurements. (B) Phase pictures of MDCK cells after miR-200 Anti-miR transfection showing changes in ZEB and TGF- $\beta$  expression (see Figure 4) precede morphological changes.

**A****miR-200c~141 locus (canine)**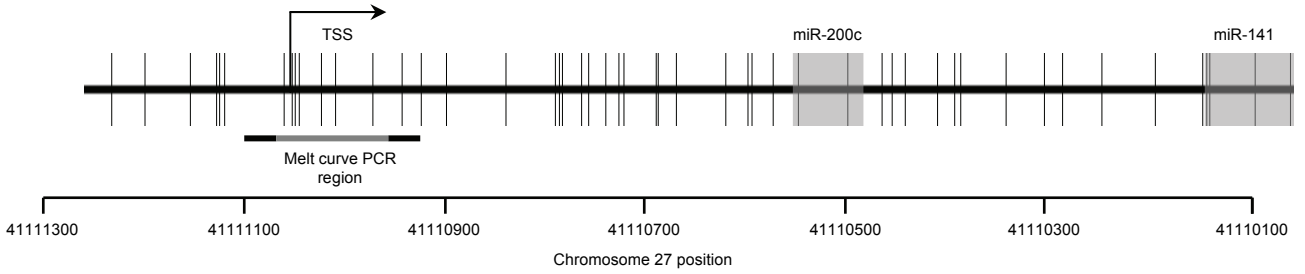**miR-200b~200a~429 locus (canine)**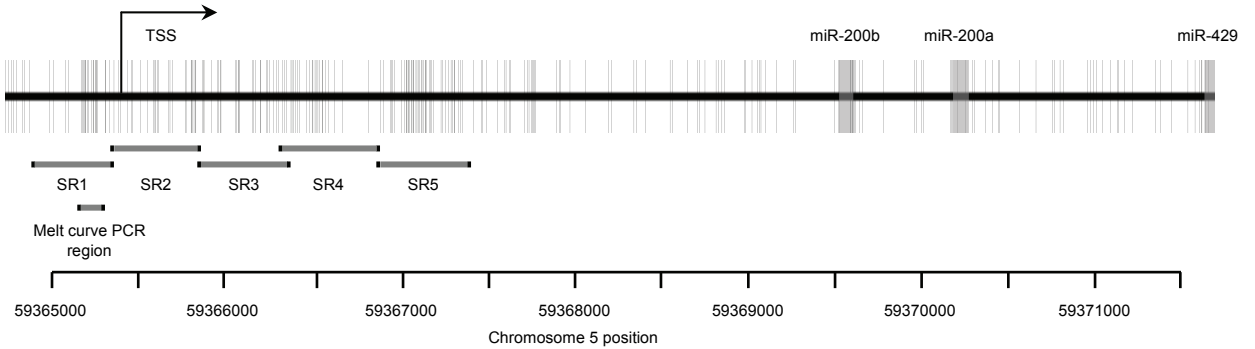**B****miR-200b~200a~429**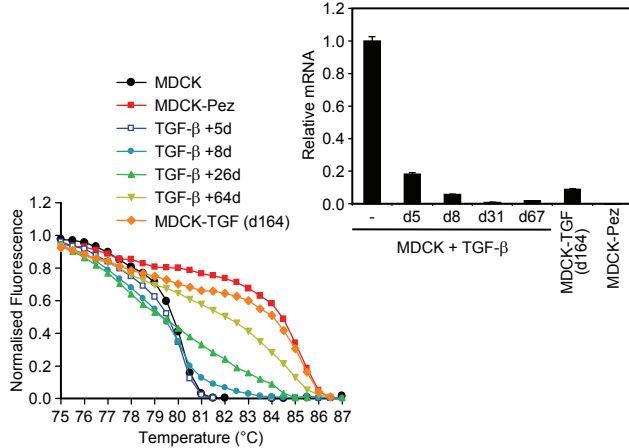**C****miR-200b~200a~429**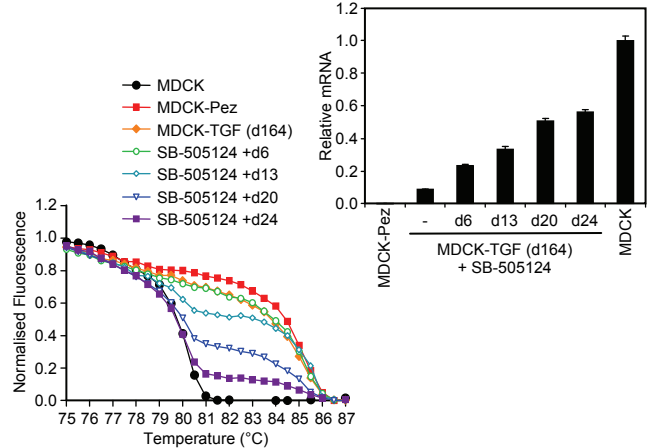

**Supplementary Figure 3.** (A) Structure of the canine miR-200b~200a~429 and miR-200c~141 loci. Vertical bars show CpG dinucleotides, the locations of the putative transcription start sites (TSS) are marked with arrows, and the Pre-miR sequences are shaded. The regions analysed in bisulfite sequencing (SR1-5) and melt curve PCR are indicated. (B) PCR melt curve analysis around the miR-200b~200a~429 TSS. MDCK cells were treated with TGF- $\beta$ 1 for the indicated time periods followed by melt curve analysis with MDCK and MDCK-Pez samples representing unmethylated and methylated profiles. (C) TGF- $\beta$  signaling was inhibited in MDCK-TGF cells (d164) using the 1 $\mu$ M SB-505124 over a 24 d timecourse and methylation of the miR-200b~200a~429 promoter assessed by melt curve analysis.

**Supplementary Table 1.** mRNA & miRNA correlations in Primary Human IDC

|                |                | correlation | Significance<br>of correlation<br>(P value) |          | correlation    | Significance<br>of correlation<br>(P value) |                   |
|----------------|----------------|-------------|---------------------------------------------|----------|----------------|---------------------------------------------|-------------------|
| ZEB1           | TGF- $\beta$ 1 | +           | <b>&lt;0.0001</b>                           | miR-200a | TGF- $\beta$ 1 | 0.2185                                      |                   |
|                | TGF- $\beta$ 2 | +           | <b>&lt;0.0001</b>                           |          | TGF- $\beta$ 2 | 0.1041                                      |                   |
|                | TGF- $\beta$ 3 | +           | <b>&lt;0.0001</b>                           |          | TGF- $\beta$ 3 | 0.6937                                      |                   |
|                | ZEB2           | +           | <b>&lt;0.0001</b>                           |          | ZEB1           | 0.0911                                      |                   |
|                | miR-200a       |             | 0.0911                                      |          | ZEB2           | 0.1225                                      |                   |
|                | miR-200b       |             | 0.2734                                      |          | miR-200b       | +                                           | <b>&lt;0.0001</b> |
|                | miR-200c       | -           | <b>0.0014</b>                               |          | miR-200c       | +                                           | <b>0.0427</b>     |
|                | miR-141        | -           | <b>0.0188</b>                               |          | miR-141        | +                                           | <b>0.0005</b>     |
| ZEB2           | TGF- $\beta$ 1 | +           | <b>&lt;0.0001</b>                           | miR-200b | TGF- $\beta$ 1 | 0.3046                                      |                   |
|                | TGF- $\beta$ 2 | +           | <b>0.0017</b>                               |          | TGF- $\beta$ 2 | -                                           | <b>0.0158</b>     |
|                | TGF- $\beta$ 3 | +           | <b>&lt;0.0001</b>                           |          | TGF- $\beta$ 3 |                                             | 0.2447            |
|                | ZEB1           | +           | <b>&lt;0.0001</b>                           |          | ZEB1           |                                             | 0.2734            |
|                | miR-200a       |             | 0.1225                                      |          | ZEB2           |                                             | 0.3307            |
|                | miR-200b       |             | 0.3307                                      |          | miR-200a       | +                                           | <b>&lt;0.0001</b> |
|                | miR-200c       | -           | <b>0.0010</b>                               |          | miR-200c       | +                                           | <b>0.0050</b>     |
|                | miR-141        | -           | <b>0.0308</b>                               |          | miR-141        | +                                           | <b>0.0002</b>     |
| TGF- $\beta$ 1 | TGF- $\beta$ 2 | +           | <b>0.0024</b>                               | miR-200c | TGF- $\beta$ 1 | -                                           | <b>0.0090</b>     |
|                | TGF- $\beta$ 3 | +           | <b>0.0002</b>                               |          | TGF- $\beta$ 2 | -                                           | <b>0.0047</b>     |
|                | ZEB1           | +           | <b>&lt;0.0001</b>                           |          | TGF- $\beta$ 3 |                                             | 0.4537            |
|                | ZEB2           | +           | <b>&lt;0.0001</b>                           |          | ZEB1           | -                                           | <b>0.0014</b>     |
|                | miR-200a       |             | 0.2185                                      |          | ZEB2           | -                                           | <b>0.0010</b>     |
|                | miR-200b       |             | 0.3046                                      |          | miR-200a       | +                                           | <b>0.0427</b>     |
|                | miR-200c       | -           | <b>0.0090</b>                               |          | miR-200b       | +                                           | <b>0.0050</b>     |
|                | miR-141        |             | 0.1150                                      |          | miR-141        | +                                           | <b>&lt;0.0001</b> |
| TGF- $\beta$ 2 | TGF- $\beta$ 1 | +           | <b>0.0024</b>                               | miR-141  | TGF- $\beta$ 1 |                                             | 0.1150            |
|                | TGF- $\beta$ 3 |             | 0.1477                                      |          | TGF- $\beta$ 2 | -                                           | <b>0.0040</b>     |
|                | ZEB1           | +           | <b>&lt;0.0001</b>                           |          | TGF- $\beta$ 3 |                                             | 0.9890            |
|                | ZEB2           | +           | <b>0.0017</b>                               |          | ZEB1           | -                                           | <b>0.0188</b>     |
|                | miR-200a       |             | 0.1041                                      |          | ZEB2           | -                                           | <b>0.0308</b>     |
|                | miR-200b       | -           | <b>0.0158</b>                               |          | miR-200a       | +                                           | <b>0.0005</b>     |
|                | miR-200c       | -           | <b>0.0047</b>                               |          | miR-200b       | +                                           | <b>0.0002</b>     |
|                | miR-141        | -           | <b>0.0040</b>                               |          | miR-200c       | +                                           | <b>&lt;0.0001</b> |
| TGF- $\beta$ 3 | TGF- $\beta$ 1 | +           | <b>0.0002</b>                               |          |                |                                             |                   |
|                | TGF- $\beta$ 2 |             | 0.1477                                      |          |                |                                             |                   |
|                | ZEB1           | +           | <b>&lt;0.0001</b>                           |          |                |                                             |                   |
|                | ZEB2           | +           | <b>&lt;0.0001</b>                           |          |                |                                             |                   |
|                | miR-200a       |             | 0.6937                                      |          |                |                                             |                   |
|                | miR-200b       |             | 0.2447                                      |          |                |                                             |                   |
|                | miR-200c       |             | 0.4537                                      |          |                |                                             |                   |
| miR-141        |                | 0.9890      |                                             |          |                |                                             |                   |

Correlations between miR-200, ZEB and TGF- $\beta$  in 27 invasive ductal breast cancer samples. P-values are calculated using Pearson correlation coefficients (significant correlations are highlighted).

**Supplemental Table 2 - Primers used for miR-200 loci methylation analysis**

| Promoter                 | Region                            | Primer Sequence                           | Primer Position <sup>a</sup> | Number of CpGs Analysed <sup>b</sup> |
|--------------------------|-----------------------------------|-------------------------------------------|------------------------------|--------------------------------------|
| Canine miR-200c~141      | MCR                               | F 5'-GGTAGTTTATGGTAGGAGGATA-3'            | chr27:41111055-41111076      | 7                                    |
|                          |                                   | R 5'-GAAAAAAAAAAAAAAAAAATCRAAACCCAAAAT-3' | chr27:41110910-41110940      |                                      |
| Canine miR-200b~200a~429 | MCR                               | F 5'-AGTTTTTTTTTTTGGTTTTTGTTTAAGTTG-3'    | chr5:59365176-59365205       | 15                                   |
|                          |                                   | R 5'-TATATCCCCTAAACTCCATAAACCAA-3'        | chr5:59365317-59365343       |                                      |
|                          | SR1                               | F 5'-GGTATATAGGGGAGGTAGATT-3'             | chr5:59364919-59364939       | 22                                   |
|                          |                                   | R 5'-CATACAAATACCTACTCACTAC-3'            | chr5:59365375-59365396       |                                      |
|                          | SR2                               | F 5'-TYGGTAGTGAGTAGGTATTTG-3'             | chr5:59365372-59365392       | 24                                   |
|                          |                                   | R 5'-TACCTACCCCAACAAATCTTAC-3'            | chr5:59365886-59365907       |                                      |
|                          | SR3                               | F 5'-GATTTGTTGGGGTAGGTAAGT-3'             | chr5:59365890-59365910       | 27                                   |
|                          |                                   | R 5'-AAAAACCTAAATCCAAATCAAACC-3'          | chr5:59366398-59366421       |                                      |
|                          | SR4                               | F 5'-GGAGGGAAGGGTTTGGTTT-3'               | chr5:59366352-59366370       | 24                                   |
|                          |                                   | R 5'-ATCCCTATCTTACAACCTATTTTACA-3'        | chr5:59366915-59366939       |                                      |
| SR5                      | F 5'-TGTAATAAGTTGTAAGATAGGGAT-3'  | chr5:59366915-59366939                    | 42                           |                                      |
|                          | R 5'-CAAAAATAAATCAAAAACCCAAAAC-3' | chr5:59367444-59367470                    |                              |                                      |
| Human miR-200c~141       | MCR                               | F 5'-GGTAGTTTATGGTAGGAGGATA-3'            | chr12:7072308-7072329        | 8                                    |
|                          |                                   | R 5'-AAACRAAAAACTTTAAAACCCCAA-3'          | chr12:7072445-7072470        |                                      |
| Human miR-200b~200a~429  | MCR                               | F 5'-TGGGGYGGGGAGTATTGT-3'                | chr1:1098207-1098224         | 12                                   |
|                          |                                   | R 5'-TAACACAAAAAATCAATTCAAACCTA-3'        | chr1:1098348-1098373         |                                      |

Y – C/T. R – A/G. <sup>a</sup>Primer position, as determined by UCSC Genome Browser Database (GBD, <http://genome.ucsc.edu>) Human February 2009 (hg19) or Canine May 2005 (canFam2) assembly. <sup>b</sup>Number of CpGs in the PCR product between the primer binding sites. SR1-5 designates Sequencing Regions. MCR designates regions analysed by melt curve PCR.
